# Supplementary material for: Toward realistic computer modeling of paraffin-based composite materials: critical assessment of atomic-scale models of paraffins
Source: Royal Society of Chemistry journal article supplement (doi:10.1039/c9ra07325f), 2019-01-01
Supplement: c9ra07325f2.zip [file forcefield.doc]

OPLS-AA/L all-atom force field (2001 aminoacid dihedrals)
