# Supplementary material for: Toward realistic computer modeling of paraffin-based composite materials: critical assessment of atomic-scale models of paraffins
Source: Royal Society of Chemistry journal article supplement (doi:10.1039/c9ra07325f), 2019-01-01
Supplement: c9ra07325f2.zip [file forcefield.doc]

CHARMM36 all-atom force field (March 2019)

*******************************************************************************
*					 CHARMM36 port writted by								  *
*					 E. Prabhu Raman, Justin A. Lemkul, Robert Best			  *
*					 and Alexander D. MacKerell, Jr.						  *
*					 CHARMM force field homepage:							  *
*					 www.mackerell.umaryland.edu/CHARMM_ff_params.html		  *
*******************************************************************************

Parameters taken from CHARMM36 and CGenFF 4.1 
  Included are topologies and parameters from
	top_all36_prot.rtf			par_all36m_prot.prm
	toppar_all36_prot_heme.str
	toppar_all36_prot_mod_d_aminoacids.str
	toppar_all36_prot_modify_res.str
	toppar_all36_prot_retinol.str

	top_all36_na.rtf			par_all36_na.prm
	toppar_all36_na_modifications.str
	toppar_all36_na_nad_ppi.str
	toppar_all36_na_rna_modified.str

	top_all36_lipid.rtf			par_all36_lipid.prm
	toppar_all36_lipid_bacterial.str
	toppar_all36_lipid_cardiolipin.str
	toppar_all36_lipid_cholesterol.str
	toppar_all36_lipid_detergent.str
	toppar_all36_lipid_inositol.str
	toppar_all36_lipid_miscellaneous.str
	toppar_all36_lipid_prot.str
	toppar_all36_lipid_sphingo.str
	toppar_all36_lipid_yeast.str

	top_all36_carb.rtf			par_all36_carb.prm
	toppar_all36_carb_glycolipid.str
	toppar_all36_carb_glycopeptide.str

	top_all36_cgenff.rtf		par_all36_cgenff.prm

	top_all35_ethers.rtf		par_all35_ethers.prm

	toppar_water_ions.str

    top_all22_prot_metals.inp   par_all22_prot_metals.inp

	top_silicates.inp			par_silicates.inp


References:

** Proteins

! CHARMM36m
Huang, J., Rauscher, S., Nawrocki, G., Ran, T., Feig, M., de Groot, B.L.,
Grubmuller, H., and MacKerell, Jr., A.D. CHARMM36m: an improved force field
for folded and intrinsically disordered proteins, Nature Methods, 2016, DOI:
10.1038/nmeth.4067.

! CHARMM36
Best, R. B. et al. Optimization of the Additive CHARMM All-Atom Protein
Force Field Targeting Improved Sampling of the Backbone phi, psi and Side-Chain
chi1 and chi2 Dihedral Angles, Journal of Chemical Theory and Computation, 
2012, 8: 3257-3273.

MacKerell, Jr., A.D., Feig, M., Brooks, III, C.L. Extending the
treatment of backbone energetics in protein force fields: limitations
of gas-phase quantum mechanics in reproducing protein conformational
distributions in molecular dynamics simulations, Journal of
Computational Chemistry, 2004, 25: 1400-1415.

MacKerell, Jr., A.D.,  et al. All-atom empirical potential for 
molecular modeling and dynamics Studies of proteins, Journal of 
Physical Chemistry B, 1998, 102, 3586-3616.

! phosphotyrosine
Feng, M.-H., Philippopoulos, M., MacKerell, Jr., A.D. and Lim, C.
Structural Characterization of the Phosphotyrosine Binding Region of a
High-Affinity aSH2 Domain-Phosphopeptide Complex by Molecular Dynamics
Simulation and Chemical Shift Calculations. Journal of the American
Chemical Society, 1996, 118: 11265-11277.

** Lipids

Klauda, J. B. et al. Improving the CHARMM Force Field for Polyunsaturated
Fatty Acid Chains, Journal of Physical Chemistry B, 2012, 116: 9424-9431.

Klauda, J. B. et al. Update of the CHARMM All-Atom Additive Force Field
for Lipids: Validation on Six Lipid Types, Journal of Physical Chemistry B,
2010, 114: 7830-7843.

Feller, S. and MacKerell, Jr., A.D. An Improved Empirical Potential
Energy Function for  Molecular Simulations of Phospholipids, Journal
of Physical Chemistry B, 2000, 104: 7510-7515.

! cholesterol
Lim, J.B., Rogaski, B. and Klauda, J.B. Update of the Cholesterol Force Field
Parameters in CHARMM, 2012, 116: 203-210.

! bacterial lipids
Lim, J.B. & Klauda, J.B. Branching at the Iso- and Anteiso- Positions in Complex Chlamydia
Membranes: A Molecular Dynamics Study. Biochimica et Biophysica Acta (BBA) - Biomembranes,
2011, 1808: 323-331.

Pandit, K.R. & Klauda, J.B. Membrane models of E. coli containing cyclic moieties in
the aliphatic lipid chain. Biochimica et Biophysica Acta (BBA) - Biomembranes
1818:1205-1210 (2012).

! sphingomyelin
Venable, R.M., Sodt, A.J., Rogaski, B., Rui, H., Hatcher, E., MacKerell, Jr., A.D.,
Pastor, R.W., and Klauda, J.B. CHARMM All-Atom Additive Force Field for Sphingomyelin:
Elucidation of Hydrogen Bonding and of Positive Curvature. Biophysical Journal, 2014,
107: 134-145.

** Nucleic Acids

! Modified RNA nucleotides
Xu, Y., Vanommeslaeghe, K., Aleksandrov, A., MacKerell, Jr., A.D., and
Nilsson, L. Additive CHARMM Force Field for Naturally Occurring Modified
Ribonucleotides, Journal of Computational Chemistry, 2016, 37: 896-912.

! CHARMM36
Denning, E.J., Priyakumar, U.D., Nilsson, L., and MacKerell Jr., A.D.,
"Impact of 2'-hydroxyl sampling on the conformational properties of
RNA: Update of the CHARMM all-atom additive force field for RNA,"
JCC, 32: 1929-1943, 2011, PMC3082605

Hart, K., Foloppe, N., Baker, C.M., Denning, E.J., Nilsson, L. 
and MacKerell Jr., A.D. "Optimization of the CHARMM additive force 
field for DNA: Improved treatment of the BI/BII conformational 
equilibrium," JCTC, 8:348-362, 2012, PMC3285246

! NAD, PPI, etc.
Pavelites, J.J., Bash, P.A., Gao, J., and MacKerell, Jr., A.D. 
A Molecular Mechanics Force Field for NAD+, NADH and the
Pyrophosphate Groups of Nucleotides, Journal of Computational
Chemistry, 1997, 18: 221-239.

! Reactive RNA intermediates
Mayaan, E., Moser, A., MacKerell, Jr., A.D., and York, D.M. CHARMM force field
parameters for simulation of reactive intermediates in native and
thio-substituted ribozymes. Journal of Computational Chemistry, 2007, 28:495-507.

! LNA and PNA
Wang, P., Nicklaus, M.C., Marquez, V.E., Brank, A.S.,
Christman, J., Banavali, N.K. and MacKerell, Jr., A.D., Use of
Oligodeoxyribonucleotides with Conformationally Constrained
Abasic Sugar Targets to Probe the Mechanism of Base Flipping by
HhaI DNA (Cytosine C5)-Methyltransferase. Journal of the
American Chemical Society, 2000, 122:12422-12434

Hartono, YD, Xu, Y, Karshikoff, A, Nilsson, L, Villa, A. Modeling pKa
Shift in DNA Triplexes Containing Locked Nucleic Acids. J Chem Inf
Model, 58:773-783, 2018, doi: 10.1021/acs.jcim.7b00741

Jasinski, M., Feig, M., Trylska, J. Improved Force
Fields for Peptide Nucleic Acids with Optimized Backbone Torsion
Parameters. J. Chem. Theory Comput., 14: 3603-3620, 2018,
doi: 10.1021/acs/jctc.8b00291

** Carbohydrates

! pyranose monosaccharides
Guvench, O., Greene, S.N., Kamath, G., Brady, J.W., Venable, R.M.,
Pastor, R.W., MacKerell, Jr., A.D. "Additive empirical force field for
hexopyranose monosaccharides," Journal of Computational Chemistry, 29:
2543-2564, 2008. PMID: 18470966

! linear sugars, sugar alcohols, and inositol
Hatcher, E., Guvench, O., and MacKerell, Jr., A.D. "CHARMM Additive
All-Atom Force Field for Acyclic Polyalcohols, Acyclic Carbohydrates
and Inositol," Journal of Chemical Theory and Computation, 5:
1315-1327, 2009, DOI: 10.1021/ct9000608.

! hexopyranose glycosidic linkages
Guvench, O., Hatcher, E. R., Venable, R. M., Pastor, R. W., MacKerell, Jr.,
A. D. "Additive Empirical CHARMM Force Field for glycosyl linked
hexopyranoses," Journal of Chemical Theory and Computation, 5,
2353-2370, 2009, DOI: 10.1021/ct900242e

! furanose monosaccharides
Hatcher, E. R.; Guvench, O. and MacKerell, Jr., A.D. 
"CHARMM Additive All-Atom Force Field for Aldopentofuranose 
Carbohydrates and Fructofuranose." Journal of Physical Chemistry B. 
113:12466-76, 2009, PMID: 19694450

! glycosidic linkages involving furanoses
Raman, E. P., Guvench, O., MacKerell, Jr., A.D., "CHARMM Additive All-Atom
Force Field for Glycosidic Linkages in Carbohydrates Involving Furanoses,"
Journal of Physical Chemistry B, 114: 12981-12994, 2010, PMID: 20845956

! carbohydrate derivatives and glycosidic linkages for glycoproteins
Guvench, O., Mallajosyula, S.S. Raman, E.P., Hatcher, E. Vanommeslaeghe, K., 
Foster, T.J., Jamison II, F.W., and MacKerell, Jr., A.D. "CHARMM additive 
all-atom force field for carbohydrate derivatives and their utility in 
polysaccharide and carbohydrate-protein modeling," JCTC, 7: 3162-3180, 2011. 
PMC3224046

! O-glycan linkages
Mallajosyula, S. S. and MacKerell, Jr., A.D., "Influence of Solvent and
Intramolecular Hydrogen Bonding on the Conformational Properties of O-Linked
Glycopeptides," Journal of Physical Chemistry B, 115: 11215-11229, 2011
PMC3224046

! Phosphates and sulfates
Mallajosyula, S. S.; Guvench, O.; Hatcher, E. R. and MacKerell, Jr., A.D.,
CHARMM Additive All-Atom Force Field for Phosphate and Sufate Linkages in
carbohydrates" JCTC, 8: 759-776, 2012.

** CHARMM General Force Field

Vanommeslaeghe, K. et al. CHARMM General Force Field: A Force Field for Drug-Like
Molecules Compatible with the CHARMM All-Atom Additive Biological Force Fields, 
Journal of Computational Chemistry, 2010, 31: 671-690. 

Yu, W., He, X., Vanommeslaeghe, K., and MacKerell, Jr., A.D. Extension of the CHARMM 
general force field to sulfonyl-containing compounds and its utility in biomolecular 
simulations, J. Comput. Chem. 2012, 33, 2451-2468. 

! Halogens with lone pairs
Gutierrez, I.S., Lin, F.-Y., Vanommeslaeghe, K., Lemkul, J.A., Armacost, K.A.,
Brooks III, C.L., and MacKerell, Jr., A.D. Parametrization of halogen bonds in the CHARMM
general force field: Improved treatment of ligand-protein interactions, Bioorganic &
Medicinal Chemistry, 2016, 24: 4812-4825.

** Silicates
Lopes, P.E.M., Murashov, V., Tazi, M., Demchuk, E. and MacKerell, Jr., A.D. 
Development of an Empirical Force Field for Silica. Application to the Quartz-Water Interface, 
Journal of Physcial Chemistry B, 2006, 110: 2782-2792. 

** Ions

! Zn
Stote, R.H. and Karplus, M. Zinc Binding in Proteins and
Solution: A Simple but Accurate Nonbonded Representation, PROTEINS:
Structure, Function, and Genetics, 1995, 23:12-31.

! Neutral FCC metals (AG, AL, AU, CU, NI, PB, PD, PT)
Heinz, H., Vaia, R.A., Farmer, B.L., and Naik, R.R. Accurate Simulation
of Surfaces and Interfaces of Face-Centered Cubic Metals Using 12-6 and 9-6
Lennard-Jones Potentials, Journal of Physical Chemistry C, 2008, 112, 17281-17290.

** Implementation of CHARMM in GROMACS

Bjelkmar, P., Larsson, P., Cuendet, M. A, Bess, B., Lindahl, E.
Implementation of the CHARMM force field in GROMACS: Analysis of protein
stability effects from correction maps, virtual interaction sites, and
water models, Journal of Chemical Theory and Computation, 2010, 6: 459-466.
